Anesthesiology  
76:486, 1992

## Drug Contamination from Opening Glass Ampules

*To the Editor:*—Recently Zacher *et al.*<sup>1</sup> demonstrated that drug solutions could be contaminated by artificially inoculating the exterior of the glass ampule with bacteria prior to opening. Do these data support the authors' conclusion that glass ampules should routinely be swabbed with alcohol prior to opening? The only conclusion that we could draw from this study is that ampules should *not* be swabbed with a bacterial culture. In our opinion, the important question that needs to be addressed relates to the infection risk (if any) with routine handling of glass ampules in the operating room.

Despite the widespread use of propofol (Diprivan®) (which has been available in Europe since 1987), there have only been 24 reported cases (from four centers) of postoperative sepsis associated with propofol.<sup>2</sup> At each center, infection was associated with a single anesthesia care provider, and in two centers (18 cases) this person was carrying the same bacterial strain responsible for patient infection, in one case on their hands and in the other in their throat. Unfortunately, the means by which infection spread from anesthesia personnel to patients was not identified in either case.<sup>2</sup> Contamination of a propofol infusion has been reported at only one site (2 cases); however, contamination of the anesthesia provider was not found in this instance.<sup>2</sup>

While it is clear that propofol is a highly suitable growth medium for bacteria,<sup>1,3,4</sup> growth does not appear to be significant in less than 12 h.<sup>4</sup> In at least two of the reported cases, it has been alleged that the propofol solution was left in the syringe pump overnight (unreported data). It has also been shown that external contamination of a glass ampule may result in contamination of its contents.<sup>1,5</sup> However, there have been no proven cases of clinical infection as a result of contamination from a glass ampule following routine handling.

Care should also be exercised in handling all intravenous drugs, and the risk associated with routine clinical practice needs to be carefully assessed. In addition to evaluating the effect of "disinfecting the neck surface of the ampule using 70% isopropyl alcohol (wipe in one direction and let dry),"\* the value of commonly used measures such as using a gauze swab or mechanical ampule opener (which also protect anesthesia

personnel from lacerations) should also be evaluated. More extreme measures (*e.g.*, the use of antimicrobial handwash and the wearing of sterile gloves, clean garments, a facemask, and/or a hair cover\*) should not be implemented *without* first proving their value in well-conducted and appropriate clinical trials. Otherwise we may be expending inappropriate time and money correcting a problem that does not exist!

IAN SMITH, F.F.A.R.C.S.

*Clinical Research Fellow*

PAUL F. WHITE, PH.D., M.D.,

F.F.A.R.A.C.S.

*Professor of Anesthesiology*

*Director of Clinical Research*

*Department of Anesthesiology*

*Washington University School of Medicine*  
*St. Louis, Missouri 63110*

## REFERENCES

1. Zacher AN, Zornow MH, Evans G: Drug contamination from opening glass ampules. *ANESTHESIOLOGY* 75:893-895, 1991
2. Carr S, Waterman S, Rutherford G, Martin R, Francis B, Gensheimer K, Altamirano J, Hall W, Robinson B, Shah S, Wilcox R: Postsurgical infections associated with an extrinsically contaminated intravenous anesthetic agent: California, Illinois, Maine, and Michigan, 1990. *MMWR* 39:426-427, 433, 1990
3. Thomas DV: Propofol supports bacterial growth (letter). *Br J Anaesth* 66:274, 1991
4. Keammerer D, Mayhall CG, Hall GO, Pesko LJ, Thomas RB: Microbial growth patterns in intravenous fat emulsions. *Am J Hosp Pharm* 40:1650-1653, 1983
5. Kempen PM, Treiber HS: Contamination of drugs in ampules: Container as culprit! (abstract). *Anesth Analg* 70:S197, 1990

(Accepted for publication December 13, 1991.)

\* Stuart Pharmaceuticals: Diprivan® package insert, 1991.

Anesthesiology  
76:486-487, 1992

*In Reply:*—We appreciate the comments of Smith and White concerning our recent article on the contamination of propofol ampules.<sup>1</sup> In this article, we provided evidence that glass ampules containing sterile solutions could be contaminated by merely breaking open the vial and that this risk may be reduced by wiping the neck of the vial with an alcohol swab. Whether this mechanism of contamination was involved in any or all of the numerous reported cases of postoperative fever and/or infection due to contaminated propofol (84 cases from 28 hospitals over 13 months ending January 11, 1991) will probably never be known.\* Assessment of the actual clinical risk associated with

opening glass vials will await the large scale prospective study suggested by Smith and White. In the meantime, it must be noted that the recommendation to wipe the neck of the propofol vials with alcohol is not ours, but rather that of Stuart Pharmaceuticals. In a letter detailing the new handling instructions for propofol, they state, "Disinfect neck surface of ampule using 70% isopropyl alcohol. Swab neck of ampule by wiping in one direction and let dry."\* Our study simply demonstrated that this maneuver effectively decontaminates the outside of the glass ampule even when it has been heavily soiled with *Staphylococcus* bacteria.

ALLAN N. ZACHER, M.D.

*Clinical Instructor*

\* New Safety and Handling Information for Diprivan. Stuart Pharmaceuticals, Wilmington, Delaware, February 5, 1991
